# Supplementary material
Source: MDPI journal article supplement (https://www.mdpi.com/2312-7481/10/3/16)
Supplement: s1 [file s1]

## **Supplementary Materials**

## Contents

**Table S1.** Bond lengths of **1**.

**Table S2.** Bond angles of **1**.

**Table S3.** Bond lengths of **2**·H<sub>2</sub>O.

**Table S4.** Bond angles of **2**·H<sub>2</sub>O.

**Table S5.** Bond lengths of **3**·CH<sub>3</sub>CN.

**Table S6.** Bond angles of **3**·CH<sub>3</sub>CN.

**Figure S1.** IR spectrum of **1**.

**Figure S2.** IR spectrum of **2**.

**Figure S3.** IR spectrum of **3**·0.5C<sub>6</sub>H<sub>14</sub>.

**Figure S4.** Observed (top) and simulated (bottom) XRD patterns of **1**.

**Figure S5.** Observed (top for **2**) and simulated (bottom for **2**·H<sub>2</sub>O) XRD patterns.

**Figure S6.** Observed (top for **3**·0.5C<sub>6</sub>H<sub>14</sub>) and simulated (bottom for **3**·CH<sub>3</sub>CN) XRD patterns.

**Figure S7.** Crystal packing diagram of **1** without hydrogen for clarity.

**Figure S8.** Packing diagram of **2**·H<sub>2</sub>O without hydrogen atoms for clarity.

**Figure S9.** Packing diagram of **3**·CH<sub>3</sub>CN without hydrogen atoms for clarity.

**Figure S10.** Field dependence of magnetization for **1** at 2 K. The red solid line represents the Brillouin function with  $g = 2.3$ .

**Figure S11.** Field dependence of magnetization for **2** at 2 K.

**Figure S12.** Field dependence of magnetization for **3**·0.5C<sub>6</sub>H<sub>14</sub> at 2 K. The red solid line represents the Brillouin function with  $g = 2.1$ .

**Figure S13.** Diffuse reflectance spectra of **1** (orange solid line), **2** (blue solid line) and **3**·0.5C<sub>6</sub>H<sub>14</sub> (green solid line).

**Figure S14.** <sup>1</sup>H NMR spectrum of **1** in chloroform-*d*<sub>1</sub> at 298 K.

**Figure S15.** <sup>1</sup>H NMR spectrum of **2** in chloroform-*d*<sub>1</sub> at 298 K.

**Figure S16.** <sup>1</sup>H NMR spectrum of **3**·0.5C<sub>6</sub>H<sub>14</sub> in chloroform-*d*<sub>1</sub> at 298 K.

**Table S1.** Bond lengths of **1**.

| Atom | Atom             | Length/Å   | Atom | Atom | Length/Å   |
|------|------------------|------------|------|------|------------|
| Ru1  | Cl1 <sup>1</sup> | 2.3598(5)  | P1   | C23  | 1.7927(18) |
| Ru1  | Cl1              | 2.3598(5)  | P1   | C29  | 1.8010(18) |
| Ru1  | O1 <sup>1</sup>  | 2.0153(12) | C11  | C12  | 1.401(2)   |
| Ru1  | O1               | 2.0152(12) | C11  | C16  | 1.403(2)   |
| Ru1  | O2               | 2.0121(12) | C12  | C13  | 1.388(3)   |
| Ru1  | O2 <sup>1</sup>  | 2.0121(12) | C13  | C14  | 1.391(3)   |
| O1   | C1               | 1.283(2)   | C14  | C15  | 1.387(3)   |
| O2   | C3               | 1.278(2)   | C15  | C16  | 1.390(3)   |
| C1   | C2               | 1.395(2)   | C17  | C18  | 1.396(2)   |
| C1   | C4               | 1.508(3)   | C17  | C22  | 1.403(2)   |
| C2   | C3               | 1.402(3)   | C18  | C19  | 1.391(3)   |
| C3   | C5               | 1.500(2)   | C19  | C20  | 1.391(3)   |
| Ru2  | Cl2              | 2.3633(5)  | C20  | C21  | 1.382(3)   |
| Ru2  | Cl2 <sup>2</sup> | 2.3633(5)  | C21  | C22  | 1.389(3)   |
| Ru2  | O3 <sup>2</sup>  | 2.0183(13) | C23  | C24  | 1.397(2)   |
| Ru2  | O3               | 2.0183(13) | C23  | C28  | 1.399(3)   |
| Ru2  | O4               | 2.0110(12) | C24  | C25  | 1.388(2)   |
| Ru2  | O4 <sup>2</sup>  | 2.0110(12) | C25  | C26  | 1.392(3)   |
| O3   | C6               | 1.276(2)   | C26  | C27  | 1.388(3)   |
| O4   | C8               | 1.282(2)   | C27  | C28  | 1.391(2)   |
| C6   | C7               | 1.407(3)   | C29  | C30  | 1.395(3)   |
| C6   | C9               | 1.505(3)   | C29  | C34  | 1.398(3)   |
| C7   | C8               | 1.391(3)   | C30  | C31  | 1.388(3)   |
| C8   | C10              | 1.511(3)   | C31  | C32  | 1.389(3)   |
| P1   | C11              | 1.7980(18) | C32  | C33  | 1.394(3)   |
| P1   | C17              | 1.7937(18) | C33  | C34  | 1.387(3)   |

<sup>1</sup> -x, 1-y, 2-z; <sup>2</sup> 2-x, 2-y, 1-z

**Table S2.** Bond angles of **1**.

| Atom            | Atom | Atom             | Angle/°    | Atom | Atom | Atom | Angle/°    |
|-----------------|------|------------------|------------|------|------|------|------------|
| Cl1             | Ru1  | Cl1 <sup>1</sup> | 180.0      | C7   | C6   | C9   | 118.16(16) |
| O1              | Ru1  | Cl1              | 88.46(4)   | C8   | C7   | C6   | 126.78(16) |
| O1 <sup>1</sup> | Ru1  | Cl1              | 91.54(4)   | O4   | C8   | C7   | 126.36(17) |
| O1 <sup>1</sup> | Ru1  | Cl1 <sup>1</sup> | 88.46(4)   | O4   | C8   | C10  | 114.11(16) |
| O1              | Ru1  | Cl1 <sup>1</sup> | 91.54(4)   | C7   | C8   | C10  | 119.52(16) |
| O1              | Ru1  | O1 <sup>1</sup>  | 180.00(7)  | C11  | P1   | C29  | 110.90(8)  |
| O2 <sup>1</sup> | Ru1  | Cl1 <sup>1</sup> | 89.43(4)   | C17  | P1   | C11  | 110.83(8)  |
| O2              | Ru1  | Cl1 <sup>1</sup> | 90.57(4)   | C17  | P1   | C29  | 110.31(9)  |
| O2 <sup>1</sup> | Ru1  | Cl1              | 90.57(4)   | C23  | P1   | C11  | 110.53(8)  |
| O2              | Ru1  | Cl1              | 89.43(4)   | C23  | P1   | C17  | 107.74(8)  |
| O2 <sup>1</sup> | Ru1  | O1 <sup>1</sup>  | 94.21(5)   | C23  | P1   | C29  | 106.40(8)  |
| O2              | Ru1  | O1               | 94.21(5)   | C12  | C11  | P1   | 120.21(14) |
| O2 <sup>1</sup> | Ru1  | O1               | 85.79(5)   | C12  | C11  | C16  | 120.12(16) |
| O2              | Ru1  | O1 <sup>1</sup>  | 85.79(5)   | C16  | C11  | P1   | 119.63(13) |
| O2              | Ru1  | O2 <sup>1</sup>  | 180.0      | C13  | C12  | C11  | 119.62(17) |
| C1              | O1   | Ru1              | 122.40(11) | C12  | C13  | C14  | 119.97(17) |
| C3              | O2   | Ru1              | 122.72(11) | C15  | C14  | C13  | 120.70(18) |
| O1              | C1   | C2               | 126.52(17) | C14  | C15  | C16  | 119.99(17) |
| O1              | C1   | C4               | 114.29(16) | C15  | C16  | C11  | 119.58(16) |
| C2              | C1   | C4               | 119.19(16) | C18  | C17  | P1   | 120.82(14) |
| C1              | C2   | C3               | 127.05(17) | C18  | C17  | C22  | 119.94(16) |
| O2              | C3   | C2               | 126.45(16) | C22  | C17  | P1   | 119.23(14) |
| O2              | C3   | C5               | 114.96(16) | C19  | C18  | C17  | 119.95(17) |
| C2              | C3   | C5               | 118.58(16) | C18  | C19  | C20  | 119.70(17) |
| Cl2             | Ru2  | Cl2 <sup>2</sup> | 180.0      | C21  | C20  | C19  | 120.64(17) |
| O3 <sup>2</sup> | Ru2  | Cl2              | 87.95(4)   | C20  | C21  | C22  | 120.27(17) |
| O3 <sup>2</sup> | Ru2  | Cl2 <sup>2</sup> | 92.05(4)   | C21  | C22  | C17  | 119.50(17) |
| O3              | Ru2  | Cl2 <sup>2</sup> | 87.95(4)   | C24  | C23  | P1   | 117.70(13) |
| O3              | Ru2  | Cl2              | 92.05(4)   | C24  | C23  | C28  | 120.13(16) |
| O3              | Ru2  | O3 <sup>2</sup>  | 180.0      | C28  | C23  | P1   | 122.00(14) |
| O4              | Ru2  | Cl2              | 93.22(4)   | C25  | C24  | C23  | 119.82(17) |
| O4 <sup>2</sup> | Ru2  | Cl2              | 86.78(4)   | C24  | C25  | C26  | 119.93(17) |
| O4 <sup>2</sup> | Ru2  | Cl2 <sup>2</sup> | 93.22(4)   | C27  | C26  | C25  | 120.35(17) |
| O4              | Ru2  | Cl2 <sup>2</sup> | 86.78(4)   | C26  | C27  | C28  | 120.18(17) |

|                 |     |                 |            |     |     |     |            |
|-----------------|-----|-----------------|------------|-----|-----|-----|------------|
| O4 <sup>2</sup> | Ru2 | O3 <sup>2</sup> | 93.37(5)   | C27 | C28 | C23 | 119.53(17) |
| O4 <sup>2</sup> | Ru2 | O3              | 86.63(5)   | C30 | C29 | P1  | 121.28(14) |
| O4              | Ru2 | O3 <sup>2</sup> | 86.63(5)   | C30 | C29 | C34 | 120.12(17) |
| O4              | Ru2 | O3              | 93.37(5)   | C34 | C29 | P1  | 118.03(14) |
| O4              | Ru2 | O4 <sup>2</sup> | 180.00(7)  | C31 | C30 | C29 | 119.35(17) |
| C6              | O3  | Ru2             | 122.60(12) | C30 | C31 | C32 | 120.77(18) |
| C8              | O4  | Ru2             | 122.41(11) | C31 | C32 | C33 | 119.70(18) |
| O3              | C6  | C7              | 126.14(17) | C34 | C33 | C32 | 120.09(18) |
| O3              | C6  | C9              | 115.69(16) | C33 | C34 | C29 | 119.92(18) |

---

<sup>1</sup> -x, 1-y, 2-z; <sup>2</sup> 2-x, 2-y, 1-z

**Table S3.** Bond lengths of **2**·H<sub>2</sub>O.

| Atom | Atom | Length/Å    | Atom | Atom | Length/Å |
|------|------|-------------|------|------|----------|
| Ru1  | Ru2  | 2.66606(19) | C11  | C12  | 1.400(3) |
| Ru1  | Cl3  | 2.3667(4)   | C11  | C16  | 1.391(3) |
| Ru1  | Cl1  | 2.3395(4)   | C29  | C30  | 1.397(3) |
| Ru1  | Cl5  | 2.3678(4)   | C29  | C34  | 1.399(3) |
| Ru1  | Cl4  | 2.3586(4)   | C17  | C18  | 1.386(3) |
| Ru1  | O2   | 1.9908(13)  | C17  | C22  | 1.395(3) |
| Ru1  | O1   | 1.9949(13)  | C12  | C13  | 1.386(3) |
| Ru2  | Cl3  | 2.3640(5)   | C13  | C14  | 1.387(3) |
| Ru2  | Cl5  | 2.3780(4)   | C16  | C15  | 1.389(3) |
| Ru2  | Cl4  | 2.3586(4)   | C3   | C5   | 1.505(3) |
| Ru2  | Cl2  | 2.3313(5)   | C3   | C2   | 1.383(3) |
| Ru2  | O3   | 2.0013(15)  | C8   | C10  | 1.507(4) |
| Ru2  | O4   | 2.0010(14)  | C8   | C7   | 1.387(4) |
| P1   | C11  | 1.7927(19)  | C14  | C15  | 1.390(3) |
| P1   | C23  | 1.7913(18)  | C30  | C31  | 1.388(3) |
| P1   | C29  | 1.7910(19)  | C6   | C7   | 1.395(4) |
| P1   | C17  | 1.7877(18)  | C6   | C9   | 1.498(3) |
| O2   | C3   | 1.281(2)    | C34  | C33  | 1.393(3) |
| O3   | C8   | 1.280(3)    | C2   | C1   | 1.394(3) |
| O1   | C1   | 1.280(2)    | C4   | C1   | 1.501(3) |
| O4   | C6   | 1.273(3)    | C18  | C19  | 1.392(3) |
| C27  | C26  | 1.387(3)    | C22  | C21  | 1.385(3) |
| C27  | C28  | 1.390(3)    | C21  | C20  | 1.389(3) |
| C24  | C23  | 1.400(3)    | C19  | C20  | 1.381(3) |
| C24  | C25  | 1.388(3)    | C33  | C32  | 1.387(4) |
| C26  | C25  | 1.385(3)    | C31  | C32  | 1.378(4) |
| C28  | C23  | 1.392(2)    |      |      |          |

**Table S4.** Bond angles of  $2 \cdot \text{H}_2\text{O}$ .

| Atom | Atom | Atom | Angle/°     | Atom | Atom | Atom | Angle/°    | Atom | Atom | Atom | Angle/°    |
|------|------|------|-------------|------|------|------|------------|------|------|------|------------|
| Cl3  | Ru1  | Ru2  | 55.648(12)  | O4   | Ru2  | Cl3  | 87.82(5)   | C15  | C16  | C11  | 119.13(19) |
| Cl3  | Ru1  | Cl5  | 91.201(15)  | O4   | Ru2  | Cl5  | 89.68(4)   | O2   | C3   | C5   | 114.07(19) |
| Cl1  | Ru1  | Ru2  | 129.265(13) | O4   | Ru2  | Cl4  | 177.95(4)  | O2   | C3   | C2   | 126.39(19) |
| Cl1  | Ru1  | Cl3  | 91.514(16)  | O4   | Ru2  | Cl2  | 86.08(4)   | C2   | C3   | C5   | 119.49(19) |
| Cl1  | Ru1  | Cl5  | 92.224(16)  | O4   | Ru2  | O3   | 93.80(7)   | O3   | C8   | C10  | 113.8(2)   |
| Cl1  | Ru1  | Cl4  | 174.933(16) | Ru2  | Cl3  | Ru1  | 68.605(12) | O3   | C8   | C7   | 126.2(2)   |
| Cl5  | Ru1  | Ru2  | 56.002(11)  | Ru1  | Cl5  | Ru2  | 68.356(12) | C7   | C8   | C10  | 120.0(2)   |
| Cl4  | Ru1  | Ru2  | 55.586(11)  | C23  | P1   | C11  | 110.72(8)  | C13  | C14  | C15  | 120.24(19) |
| Cl4  | Ru1  | Cl3  | 90.839(16)  | C29  | P1   | C11  | 106.89(9)  | C31  | C30  | C29  | 119.7(2)   |
| Cl4  | Ru1  | Cl5  | 92.213(15)  | C29  | P1   | C23  | 109.10(9)  | O4   | C6   | C7   | 126.8(2)   |
| O2   | Ru1  | Ru2  | 122.95(4)   | C17  | P1   | C11  | 109.10(9)  | O4   | C6   | C9   | 113.9(2)   |
| O2   | Ru1  | Cl3  | 178.43(4)   | C17  | P1   | C23  | 107.59(9)  | C7   | C6   | C9   | 119.2(2)   |
| O2   | Ru1  | Cl1  | 89.06(4)    | C17  | P1   | C29  | 113.47(9)  | C16  | C15  | C14  | 120.6(2)   |
| O2   | Ru1  | Cl5  | 87.32(4)    | C3   | O2   | Ru1  | 121.77(13) | C33  | C34  | C29  | 118.7(2)   |
| O2   | Ru1  | Cl4  | 88.71(4)    | C8   | O3   | Ru2  | 123.36(15) | C3   | C2   | C1   | 126.27(18) |
| O2   | Ru1  | O1   | 93.60(6)    | C1   | O1   | Ru1  | 121.92(13) | C17  | C18  | C19  | 119.3(2)   |
| O1   | Ru1  | Ru2  | 123.14(4)   | C6   | O4   | Ru2  | 122.74(16) | C21  | C22  | C17  | 119.89(18) |
| O1   | Ru1  | Cl3  | 87.88(4)    | C26  | C27  | C28  | 120.34(18) | O1   | C1   | C2   | 126.15(18) |
| O1   | Ru1  | Cl1  | 88.10(4)    | C25  | C24  | C23  | 119.72(18) | O1   | C1   | C4   | 114.8(2)   |
| O1   | Ru1  | Cl5  | 179.03(4)   | C25  | C26  | C27  | 120.00(19) | C2   | C1   | C4   | 119.02(19) |
| O1   | Ru1  | Cl4  | 87.51(4)    | C27  | C28  | C23  | 119.78(18) | C22  | C21  | C20  | 119.86(19) |
| Cl3  | Ru2  | Ru1  | 55.746(11)  | C12  | C11  | P1   | 118.68(14) | C20  | C19  | C18  | 120.5(2)   |
| Cl3  | Ru2  | Cl5  | 91.019(15)  | C16  | C11  | P1   | 120.96(15) | C32  | C33  | C34  | 120.3(2)   |
| Cl5  | Ru2  | Ru1  | 55.641(11)  | C16  | C11  | C12  | 120.35(17) | C19  | C20  | C21  | 120.12(19) |
| Cl4  | Ru2  | Ru1  | 55.585(11)  | C24  | C23  | P1   | 119.36(14) | C32  | C31  | C30  | 119.8(2)   |
| Cl4  | Ru2  | Cl3  | 90.906(16)  | C28  | C23  | P1   | 120.76(14) | C31  | C32  | C33  | 120.8(2)   |
| Cl4  | Ru2  | Cl5  | 91.956(16)  | C28  | C23  | C24  | 119.87(17) | C8   | C7   | C6   | 126.6(2)   |
| Cl2  | Ru2  | Ru1  | 130.347(14) | C26  | C25  | C24  | 120.29(19) |      |      |      |            |
| Cl2  | Ru2  | Cl3  | 93.050(18)  | C30  | C29  | P1   | 119.87(16) |      |      |      |            |

| Atom | Atom | Atom | Angle/°     | Atom | Atom | Atom | Angle/°    | Atom | Atom | Atom | Angle/° |
|------|------|------|-------------|------|------|------|------------|------|------|------|---------|
| Cl2  | Ru2  | Cl5  | 174.010(18) | C30  | C29  | C34  | 120.60(19) |      |      |      |         |
| Cl2  | Ru2  | Cl4  | 92.373(17)  | C34  | C29  | P1   | 119.27(16) |      |      |      |         |
| O3   | Ru2  | Ru1  | 122.45(4)   | C18  | C17  | P1   | 121.11(15) |      |      |      |         |
| O3   | Ru2  | Cl3  | 178.13(5)   | C18  | C17  | C22  | 120.31(17) |      |      |      |         |
| O3   | Ru2  | Cl5  | 88.08(4)    | C22  | C17  | P1   | 118.44(14) |      |      |      |         |
| O3   | Ru2  | Cl4  | 87.49(5)    | C13  | C12  | C11  | 119.96(18) |      |      |      |         |
| O3   | Ru2  | Cl2  | 87.98(4)    | C12  | C13  | C14  | 119.72(19) |      |      |      |         |



**Table S5.** Bond lengths of 3·CH<sub>3</sub>CN.

| Atom  | Atom  | Length/Å   | Atom  | Atom  | Length/Å |
|-------|-------|------------|-------|-------|----------|
| Ru(1) | O(1)  | 2.0020(12) | C(13) | C(14) | 1.396(2) |
| Ru(1) | O(2)  | 2.0085(12) | C(13) | C(18) | 1.401(2) |
| Ru(1) | O(3)  | 2.0114(11) | C(14) | C(15) | 1.387(2) |
| Ru(1) | O(4)  | 2.0123(11) | C(15) | C(16) | 1.388(3) |
| Ru(1) | N(1)  | 2.0163(15) | C(16) | C(17) | 1.388(3) |
| Ru(1) | N(2)  | 2.0069(15) | C(17) | C(18) | 1.384(2) |
| S(1)  | C(11) | 1.6315(18) | C(19) | C(20) | 1.398(2) |
| S(2)  | C(12) | 1.6267(18) | C(19) | C(24) | 1.399(2) |
| O(1)  | C(1)  | 1.282(2)   | C(20) | C(21) | 1.393(2) |
| O(2)  | C(3)  | 1.279(2)   | C(21) | C(22) | 1.388(2) |
| O(3)  | C(6)  | 1.2765(19) | C(22) | C(23) | 1.388(3) |
| O(4)  | C(8)  | 1.280(2)   | C(23) | C(24) | 1.386(2) |
| N(1)  | C(11) | 1.160(2)   | C(25) | C(26) | 1.397(2) |
| N(2)  | C(12) | 1.159(2)   | C(25) | C(30) | 1.400(2) |
| C(1)  | C(2)  | 1.390(2)   | C(26) | C(27) | 1.390(2) |
| C(1)  | C(4)  | 1.508(2)   | C(27) | C(28) | 1.389(3) |
| C(2)  | C(3)  | 1.392(2)   | C(28) | C(29) | 1.386(3) |
| C(3)  | C(5)  | 1.506(2)   | C(29) | C(30) | 1.386(2) |
| C(6)  | C(7)  | 1.400(2)   | C(31) | C(32) | 1.402(2) |
| C(6)  | C(9)  | 1.504(2)   | C(31) | C(36) | 1.395(2) |
| C(7)  | C(8)  | 1.394(2)   | C(32) | C(33) | 1.384(2) |
| C(8)  | C(10) | 1.504(2)   | C(33) | C(34) | 1.382(3) |
| P(1)  | C(13) | 1.7874(16) | C(34) | C(35) | 1.391(3) |
| P(1)  | C(19) | 1.7925(16) | C(35) | C(36) | 1.387(2) |
| P(1)  | C(25) | 1.7931(16) | N(3)  | C(38) | 1.131(3) |
| P(1)  | C(31) | 1.7925(16) | C(37) | C(38) | 1.443(3) |

**Table S6.** Bond angles of 3·CH<sub>3</sub>CN.

| Atom  | Atom  | Atom  | Angle/°    | Atom  | Atom  | Atom  | Angle/°    |
|-------|-------|-------|------------|-------|-------|-------|------------|
| O(1)  | Ru(1) | O(2)  | 93.71(5)   | C(13) | P(1)  | C(25) | 106.27(7)  |
| O(1)  | Ru(1) | O(3)  | 85.99(5)   | C(13) | P(1)  | C(31) | 110.71(7)  |
| O(1)  | Ru(1) | O(4)  | 179.07(5)  | C(19) | P(1)  | C(25) | 110.84(7)  |
| O(1)  | Ru(1) | N(1)  | 92.10(5)   | C(31) | P(1)  | C(19) | 107.03(8)  |
| O(1)  | Ru(1) | N(2)  | 89.62(5)   | C(31) | P(1)  | C(25) | 110.78(7)  |
| O(2)  | Ru(1) | O(3)  | 179.69(5)  | C(14) | C(13) | P(1)  | 121.93(13) |
| O(2)  | Ru(1) | O(4)  | 87.03(5)   | C(14) | C(13) | C(18) | 120.24(15) |
| O(2)  | Ru(1) | N(1)  | 89.62(5)   | C(18) | C(13) | P(1)  | 117.83(12) |
| O(3)  | Ru(1) | O(4)  | 93.28(5)   | C(15) | C(14) | C(13) | 119.54(16) |
| O(3)  | Ru(1) | N(1)  | 90.43(5)   | C(14) | C(15) | C(16) | 119.97(16) |
| O(4)  | Ru(1) | N(1)  | 87.34(5)   | C(17) | C(16) | C(15) | 120.63(16) |
| N(2)  | Ru(1) | O(2)  | 88.50(6)   | C(18) | C(17) | C(16) | 119.94(17) |
| N(2)  | Ru(1) | O(3)  | 91.46(5)   | C(17) | C(18) | C(13) | 119.61(16) |
| N(2)  | Ru(1) | O(4)  | 90.97(5)   | C(20) | C(19) | P(1)  | 121.54(12) |
| N(2)  | Ru(1) | N(1)  | 177.54(6)  | C(20) | C(19) | C(24) | 120.24(15) |
| C(1)  | O(1)  | Ru(1) | 122.33(11) | C(24) | C(19) | P(1)  | 118.21(12) |
| C(3)  | O(2)  | Ru(1) | 122.57(11) | C(21) | C(20) | C(19) | 119.39(15) |
| C(6)  | O(3)  | Ru(1) | 122.59(11) | C(22) | C(21) | C(20) | 120.18(16) |
| C(8)  | O(4)  | Ru(1) | 121.74(11) | C(23) | C(22) | C(21) | 120.29(16) |
| C(11) | N(1)  | Ru(1) | 170.90(14) | C(24) | C(23) | C(22) | 120.20(16) |
| C(12) | N(2)  | Ru(1) | 173.04(14) | C(23) | C(24) | C(19) | 119.66(16) |
| O(1)  | C(1)  | C(2)  | 126.41(15) | C(26) | C(25) | P(1)  | 122.66(12) |
| O(1)  | C(1)  | C(4)  | 114.72(15) | C(26) | C(25) | C(30) | 120.01(15) |
| C(2)  | C(1)  | C(4)  | 118.87(15) | C(30) | C(25) | P(1)  | 117.26(12) |
| C(1)  | C(2)  | C(3)  | 127.07(16) | C(27) | C(26) | C(25) | 119.40(16) |
| O(2)  | C(3)  | C(2)  | 126.01(15) | C(28) | C(27) | C(26) | 120.35(16) |
| O(2)  | C(3)  | C(5)  | 115.61(15) | C(29) | C(28) | C(27) | 120.31(16) |
| C(2)  | C(3)  | C(5)  | 118.38(15) | C(28) | C(29) | C(30) | 119.99(16) |
| O(3)  | C(6)  | C(7)  | 125.92(15) | C(29) | C(30) | C(25) | 119.92(16) |
| O(3)  | C(6)  | C(9)  | 114.86(15) | C(32) | C(31) | P(1)  | 118.08(12) |
| C(7)  | C(6)  | C(9)  | 119.22(15) | C(36) | C(31) | P(1)  | 121.60(12) |
| C(8)  | C(7)  | C(6)  | 126.61(15) | C(36) | C(31) | C(32) | 120.32(15) |
| O(4)  | C(8)  | C(7)  | 126.49(15) | C(33) | C(32) | C(31) | 119.56(16) |
| O(4)  | C(8)  | C(10) | 114.88(15) | C(34) | C(33) | C(32) | 120.16(17) |

|       |       |       |            |       |       |       |            |
|-------|-------|-------|------------|-------|-------|-------|------------|
| C(7)  | C(8)  | C(10) | 118.59(15) | C(33) | C(34) | C(35) | 120.42(17) |
| N(1)  | C(11) | S(1)  | 178.94(16) | C(36) | C(35) | C(34) | 120.21(17) |
| N(2)  | C(12) | S(2)  | 177.92(16) | C(35) | C(36) | C(31) | 119.32(16) |
| C(13) | P(1)  | C(19) | 111.26(7)  | N(3)  | C(38) | C(37) | 178.5(3)   |

---

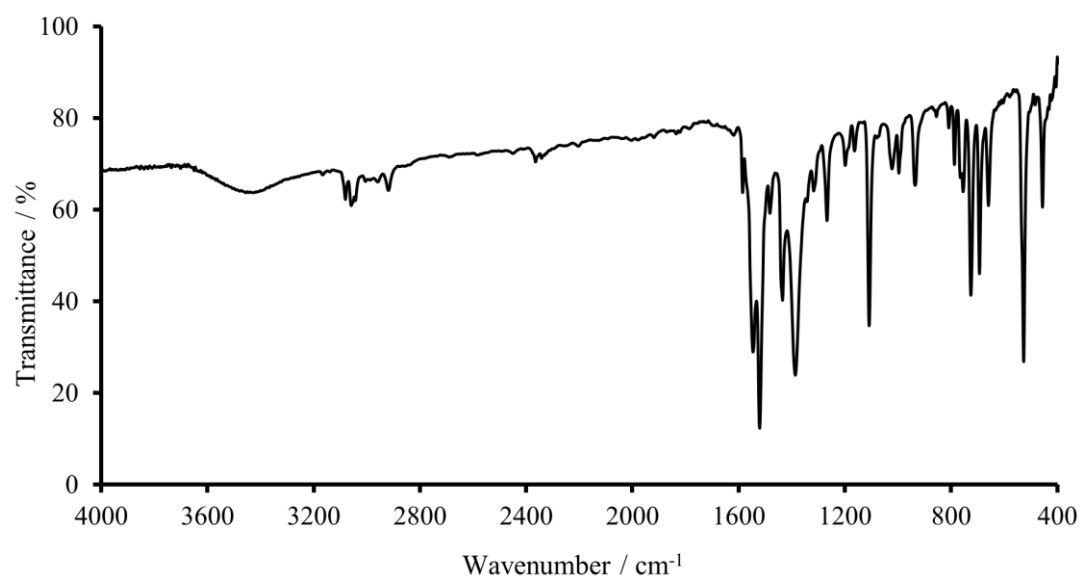

**Figure S1.** IR spectrum of **1**.

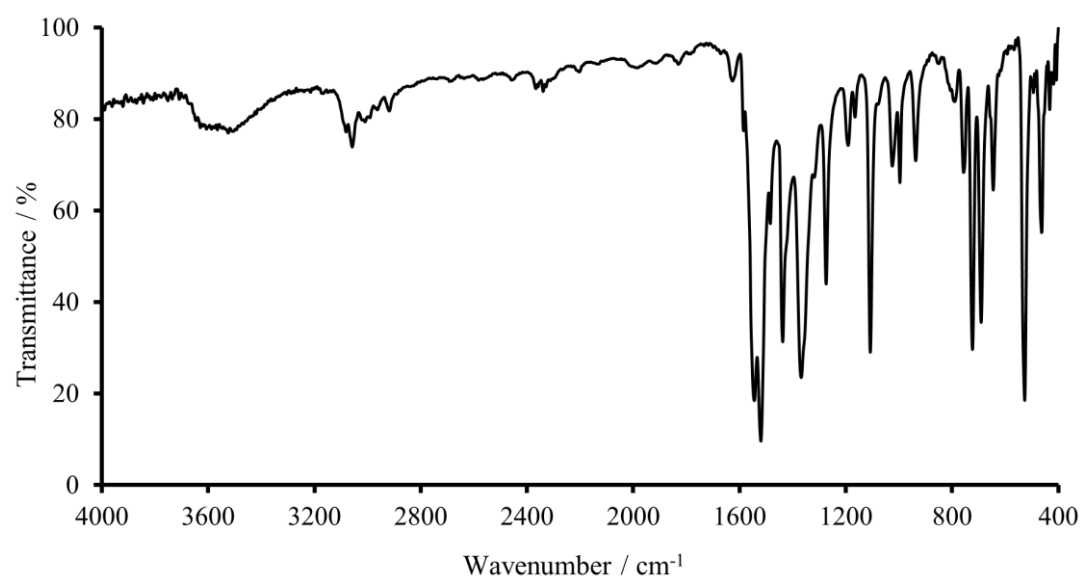

**Figure S2.** IR spectrum of **2**.

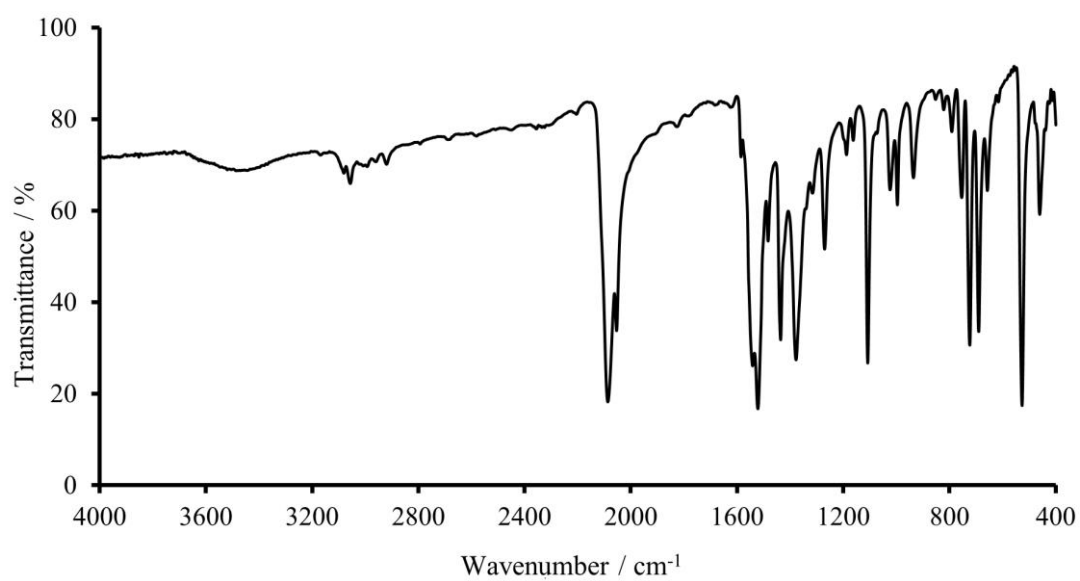

**Figure S3.** IR spectrum of  $3 \cdot 0.5\text{C}_6\text{H}_{14}$ .

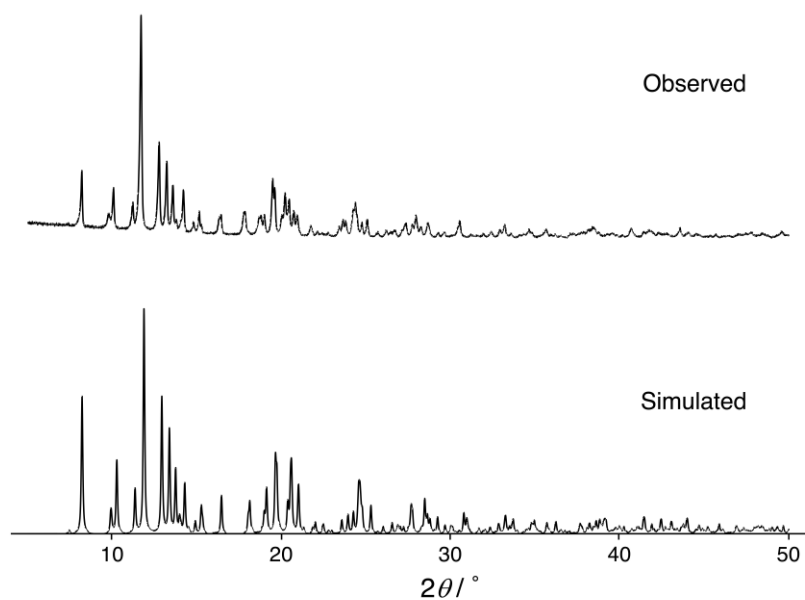

**Figure S4.** Observed (top) and simulated (bottom) XRD patterns of **1**.

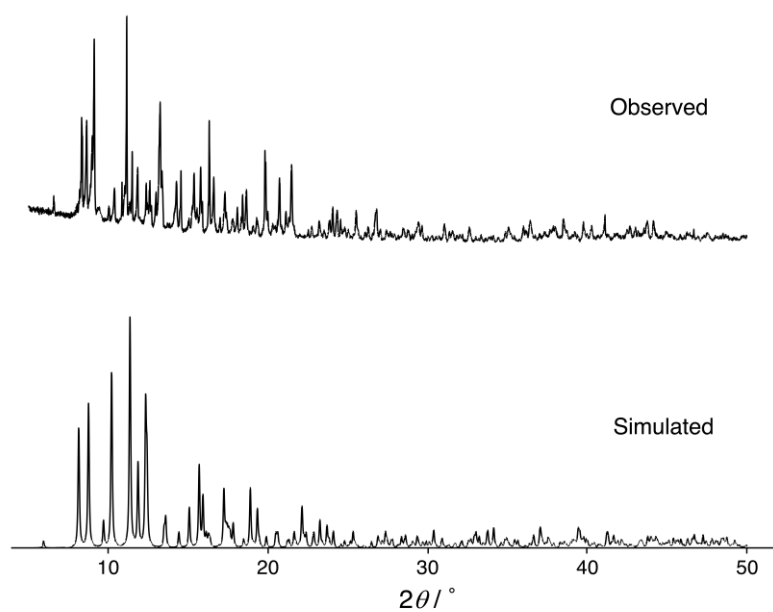

**Figure S5.** Observed (top for **2**) and simulated (bottom for **2**·H<sub>2</sub>O) XRD patterns.

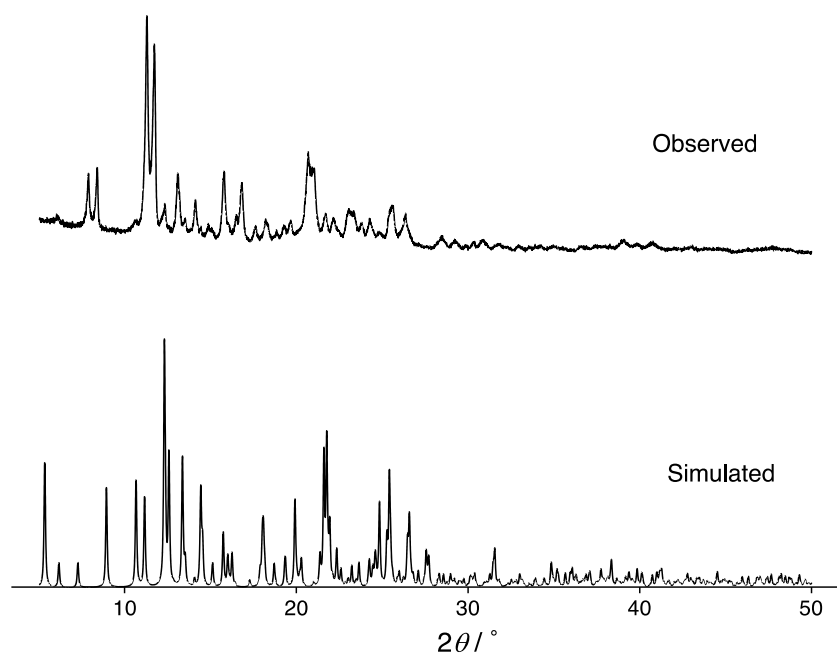

**Figure S6.** Observed (top for **3**·0.5C<sub>6</sub>H<sub>14</sub>) and simulated (bottom for **3**·CH<sub>3</sub>CN) XRD patterns.

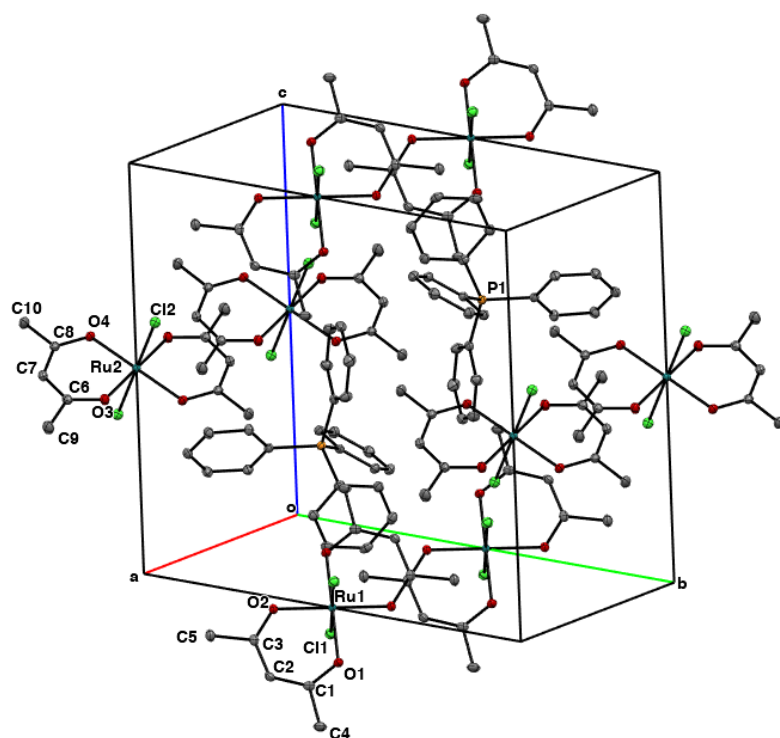

**Figure S7.** Crystal packing diagram of **1** without hydrogen atoms for clarity.

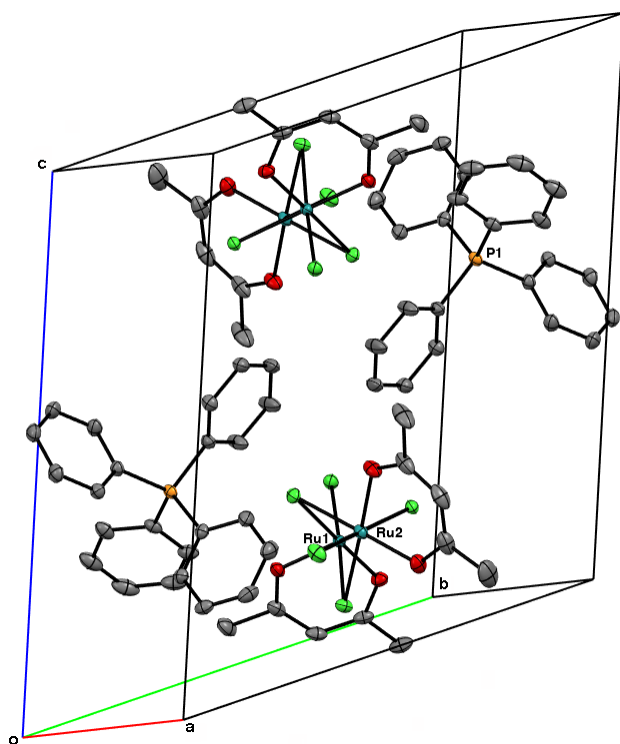

**Figure S8.** Packing diagram of **2·H<sub>2</sub>O** without hydrogen atoms for clarity.

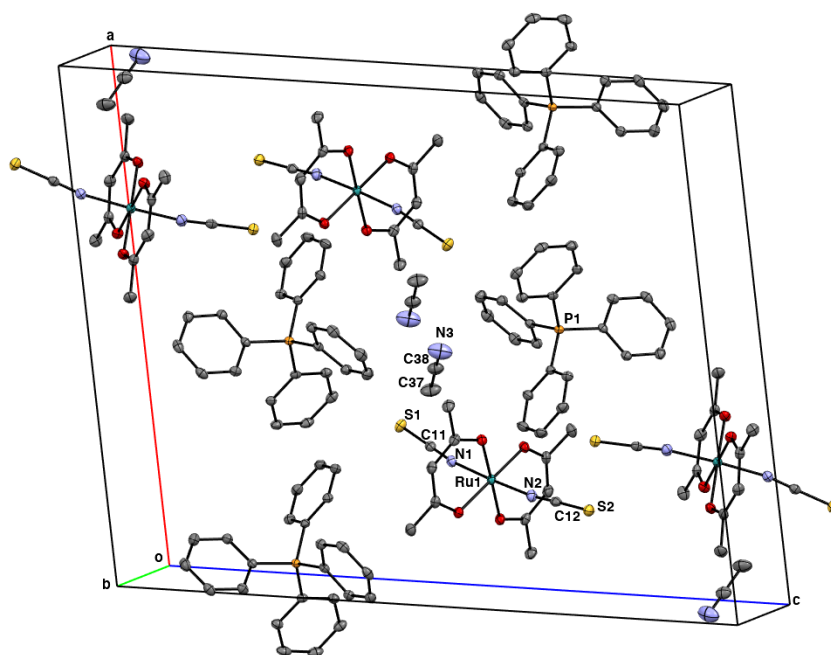

**Figure S9.** Packing diagram of  $3 \cdot \text{CH}_3\text{CN}$  without hydrogen atoms for clarity.

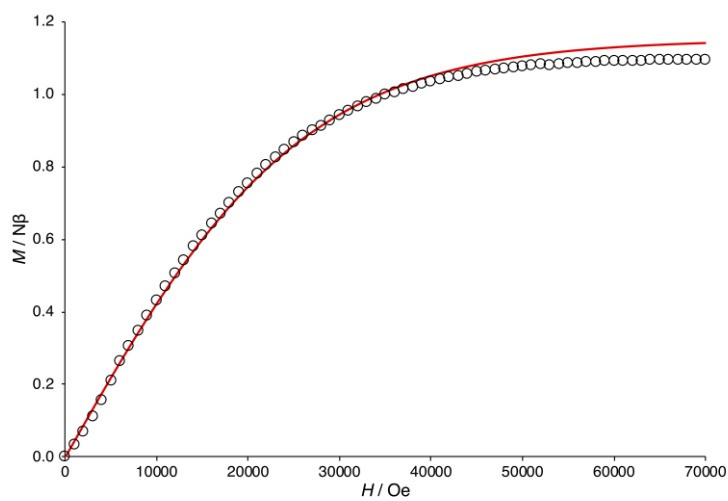

**Figure S10.** Field dependence of magnetization for **1** at 2 K. The red solid line represents the Brillouin function with  $g = 2.3$ .



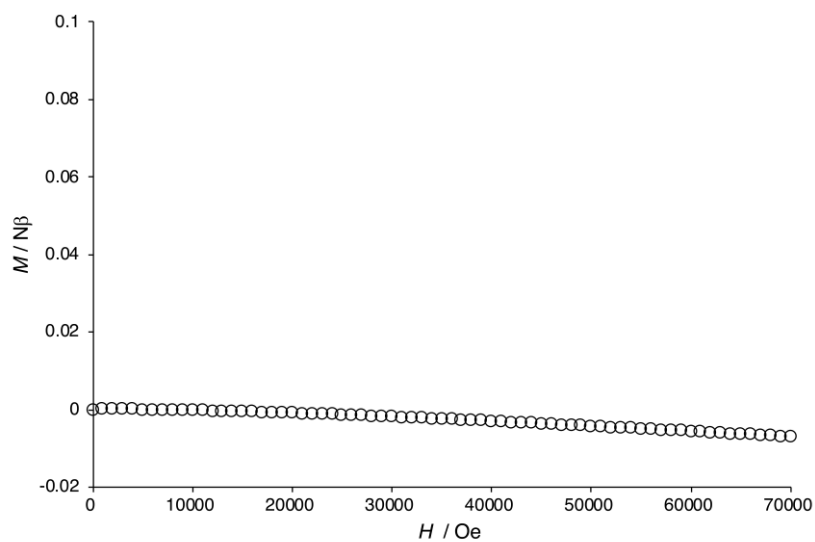

**Figure S11.** Field dependence of magnetization for **2** at 2 K.

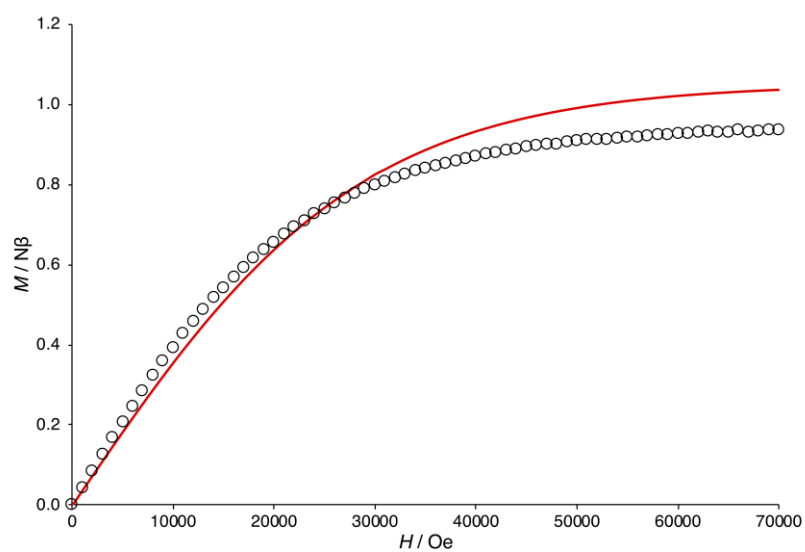

**Figure S12.** Field dependence of magnetization for **3·0.5C<sub>6</sub>H<sub>14</sub>** at 2 K. The red solid line represents the Brillouin function with  $g = 2.1$ .

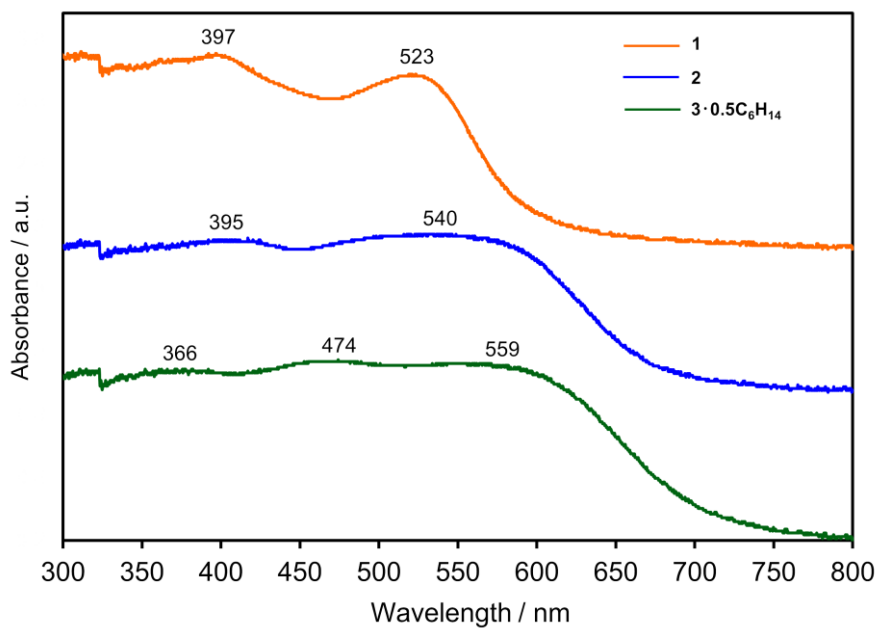

**Figure S13.** Diffuse reflectance spectra of **1** (orange solid line), **2** (blue solid line) and **3·0.5C<sub>6</sub>H<sub>14</sub>** (green solid line).

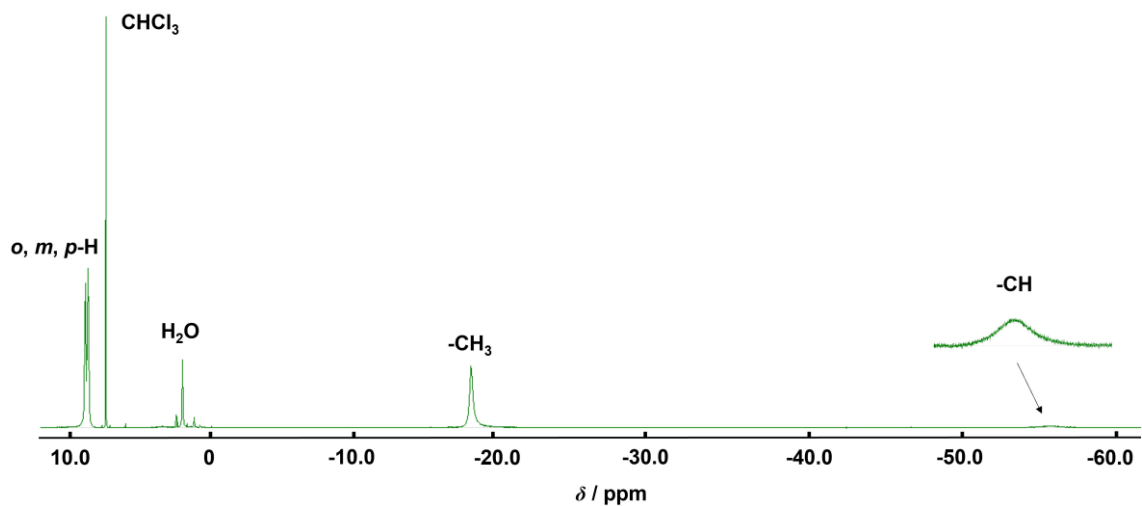

**Figure S14.** <sup>1</sup>H NMR spectrum of **1** in chloroform-*d*<sub>1</sub> at 298 K.

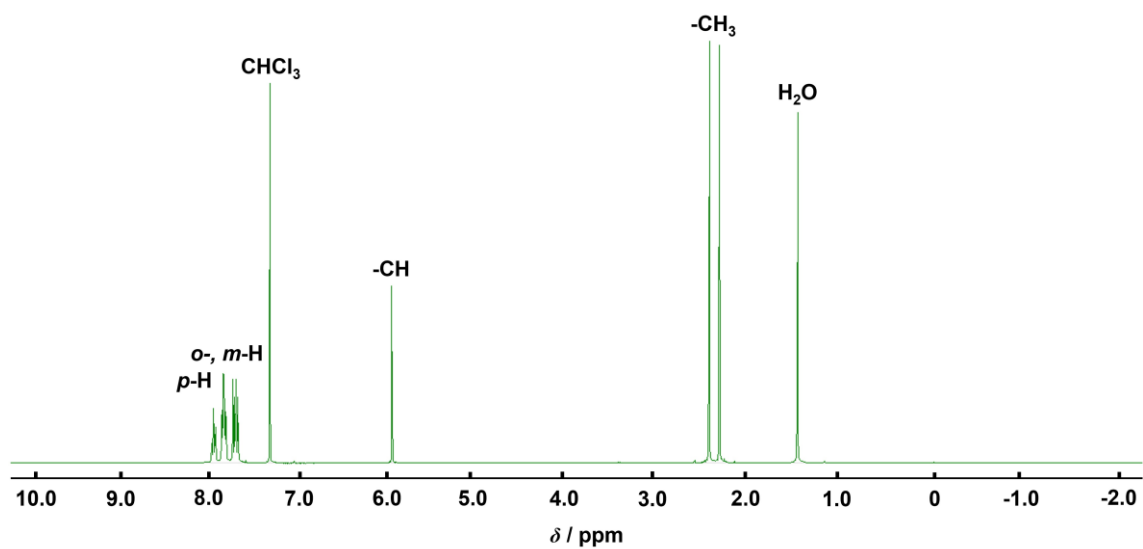

Figure S15.  $^1\text{H}$  NMR spectrum of **2** in chloroform- $d_1$  at 298 K.

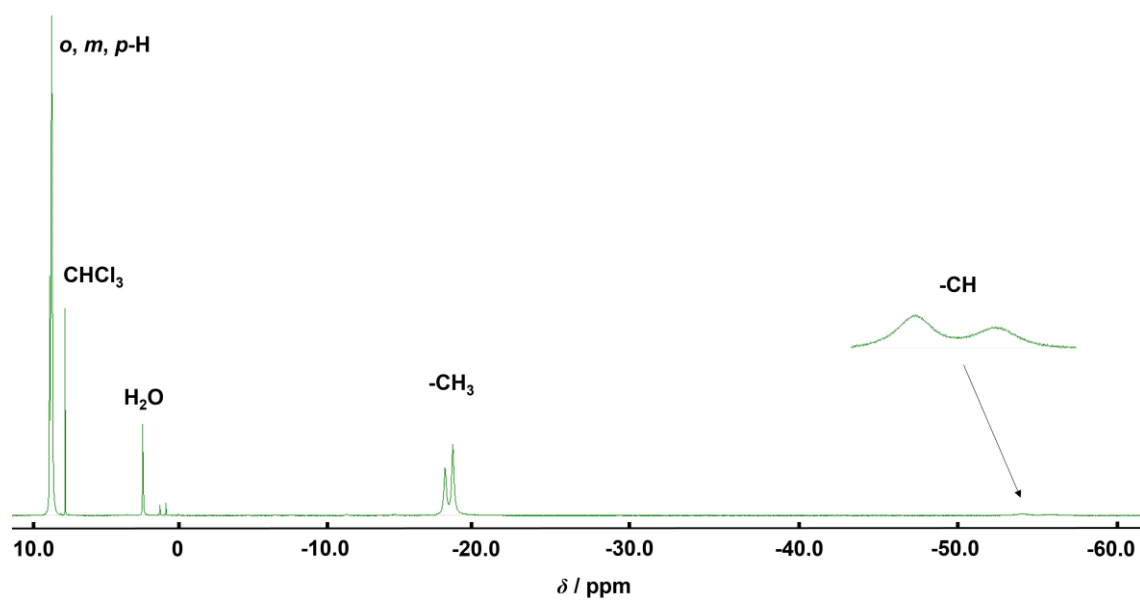

Figure S16.  $^1\text{H}$  NMR spectrum of **3·0.5C<sub>6</sub>H<sub>14</sub>** in chloroform- $d_1$  at 298 K.
